# Supplementary material
Source: PubMed Central journal article supplement (PMC5903410)
Supplement: supplementary_material_ddx280.pdf [file supplementary_material_ddx280.pdf]

**Figure S1. Axes of genetic variation separating 26 reference populations from Phase 3 of the 1000 Genomes Project.** The first three axes of genetic variation from multi-dimensional scaling of the Euclidean distance matrix between populations are sufficient to separate five ancestry groups: African (AFR), Native American (AMR), East Asian (EAS), European (EUR) and SAS (South Asian). Population codes are presented in **Table S1**.

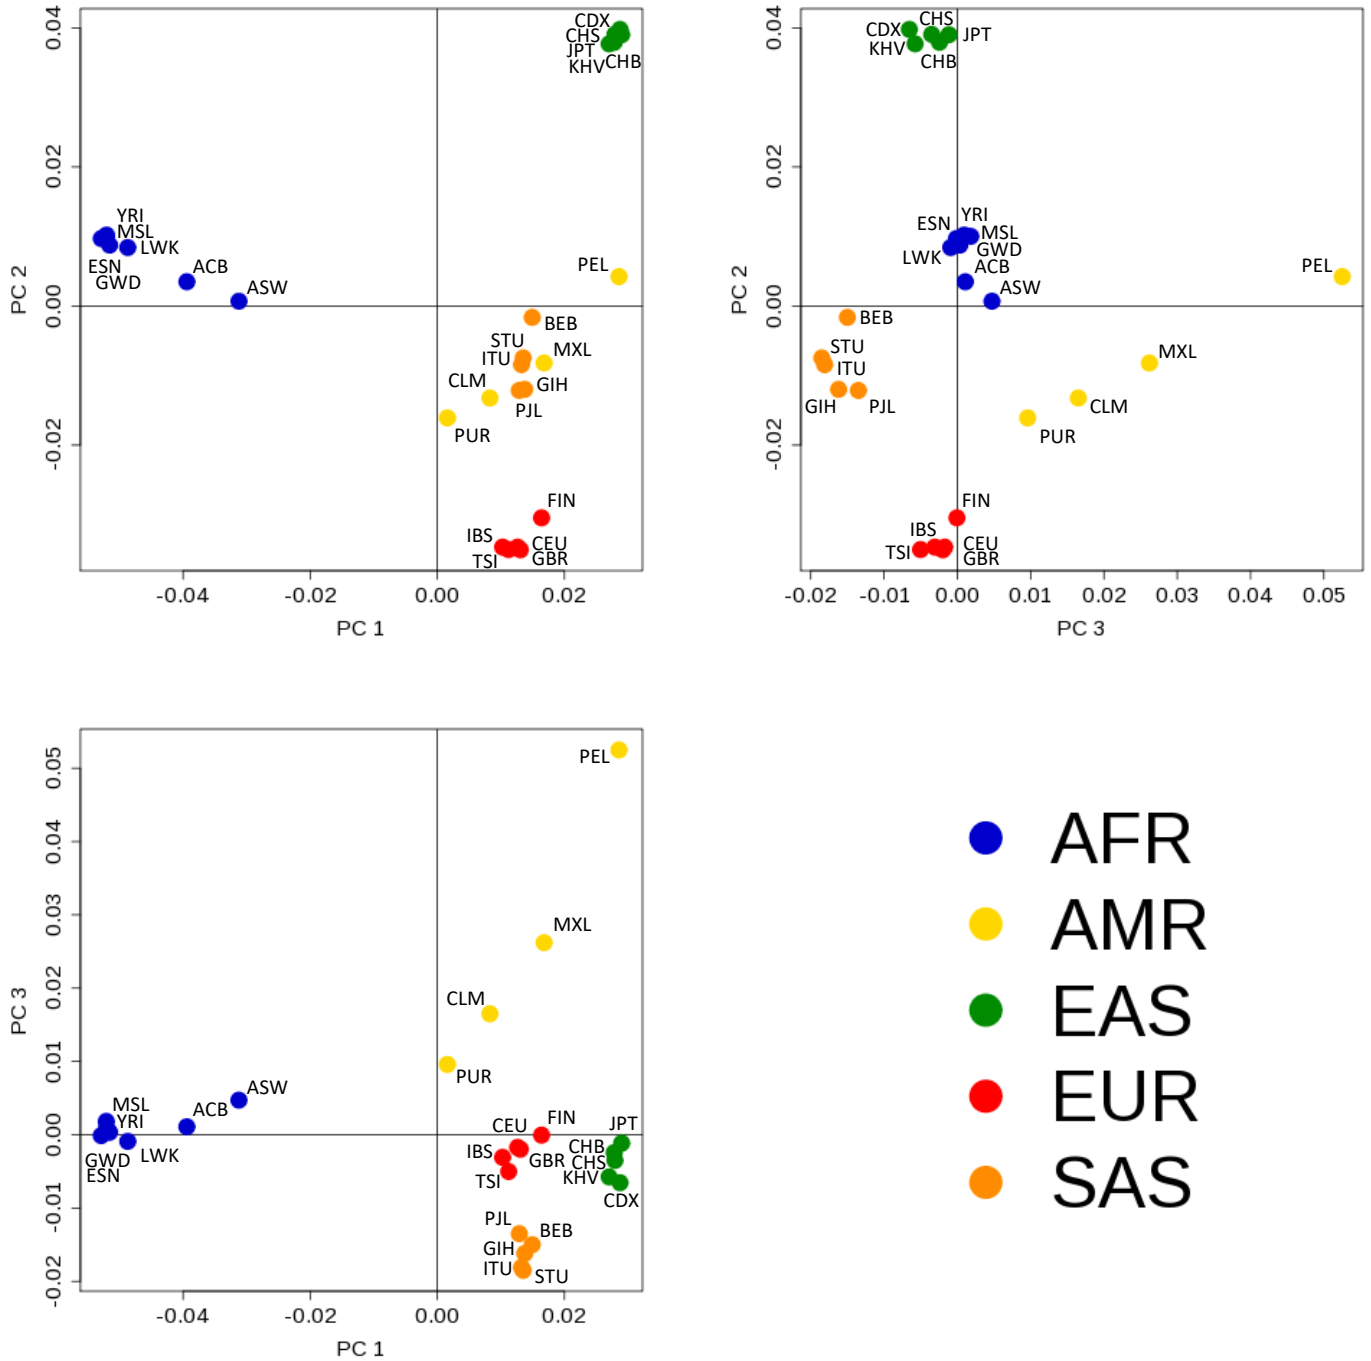

**Figure S2. Power to detect, at nominal significance ( $p < 0.05$ ): heterogeneity in allelic effects between studies due to ancestry from MR-MEGA; residual heterogeneity in allelic effects between studies after accounting for ancestry from MR-MEGA; and heterogeneity in allelic effects between studies via Cochran's  $Q$  statistic from fixed-effects meta-analysis.** Power is presented as a function of the allelic odds-ratio for each of five scenarios for heterogeneity in effects between populations, described in **Table S1**.

Homogenous scenario

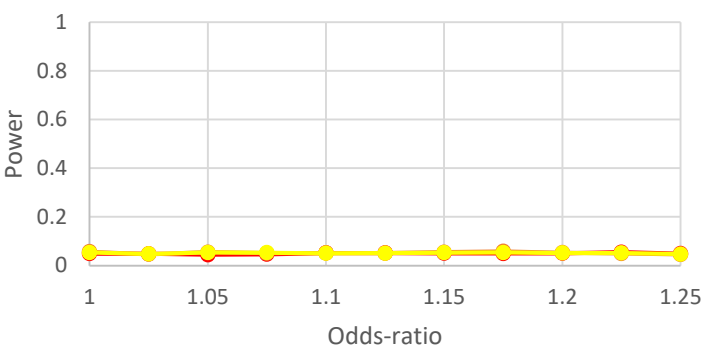

- Ancestry heterogeneity
- Residual heterogeneity
- Cochran's Q statistic

African-specific scenario

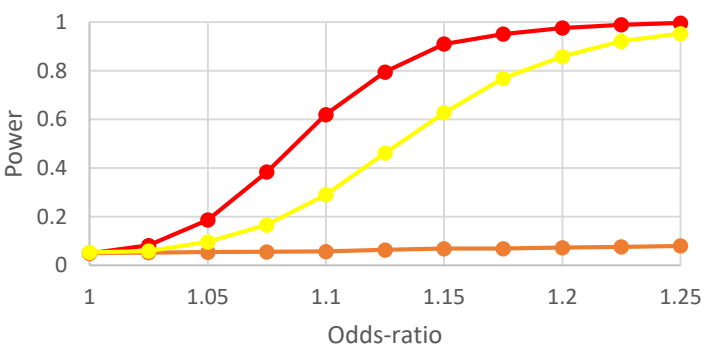

Eurasian scenario

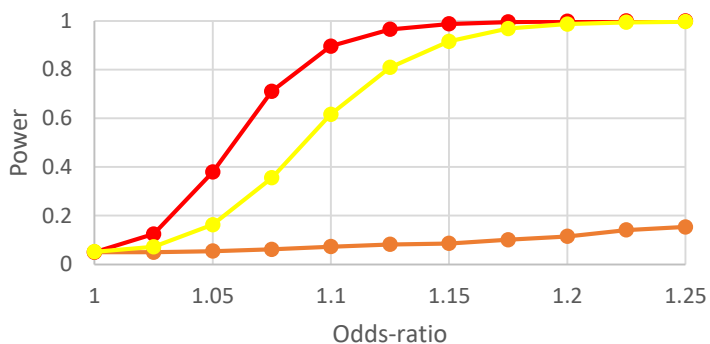

Native American scenario

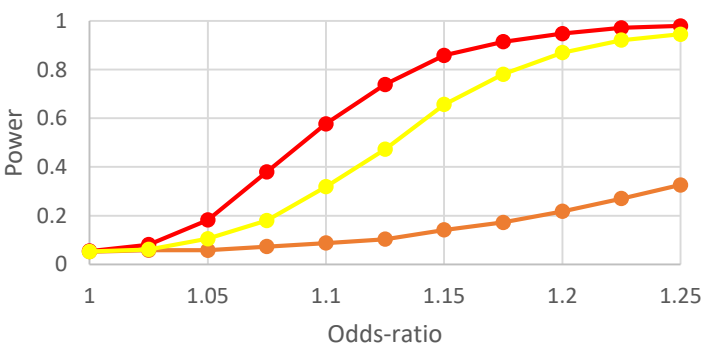

Non-ancestral heterogeneity scenario

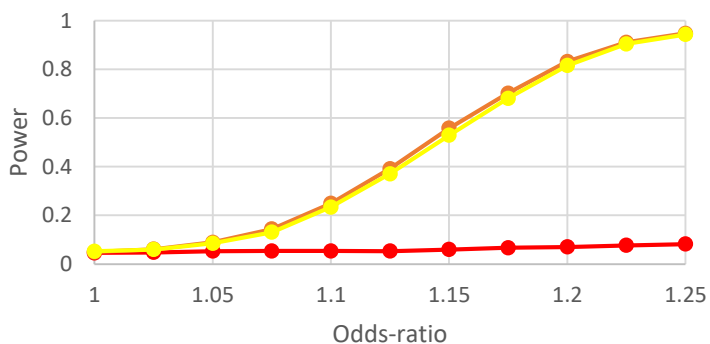

**Figure S3. Axes of genetic variation separating nine GWAS of eGFR from the COGENT-Kidney Consortium.** The first two axes of genetic variation from multi-dimensional scaling of the Euclidean distance matrix between GWAS are sufficient to separate four ancestry groups: African American (AFA), Hispanic/Latino (HIS), East Asian (EAS) and European (EUR).

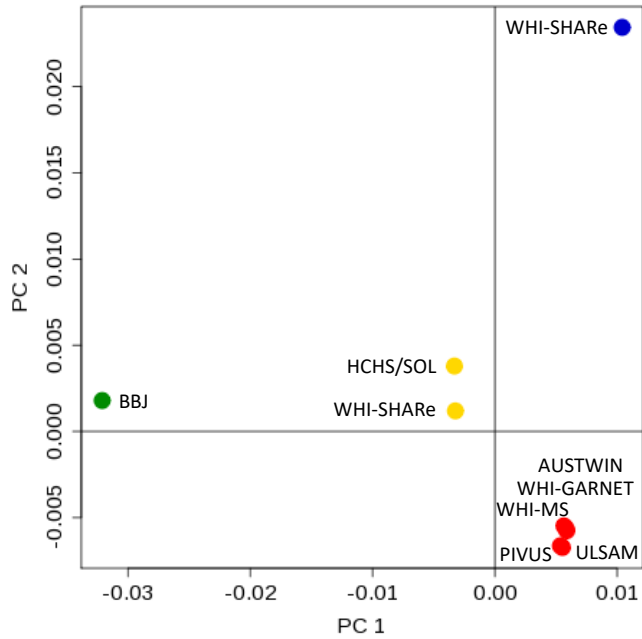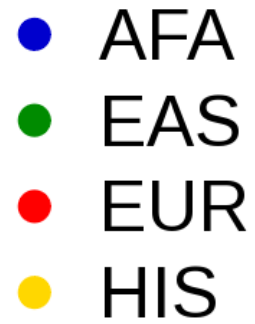

**Figure S4. Comparison of p-values obtained for association with eGFR in trans-ethnic meta-analysis of 71,461 individuals from the COGENT-Kidney Consortium from meta-regression (MR-MEGA) and fixed-effects (inverse-variance weighting).** Points are coloured according to the p-value for heterogeneity correlated with ancestry from the meta-regression:  $p < 0.05$  (red) and  $p \geq 0.05$  (blue).

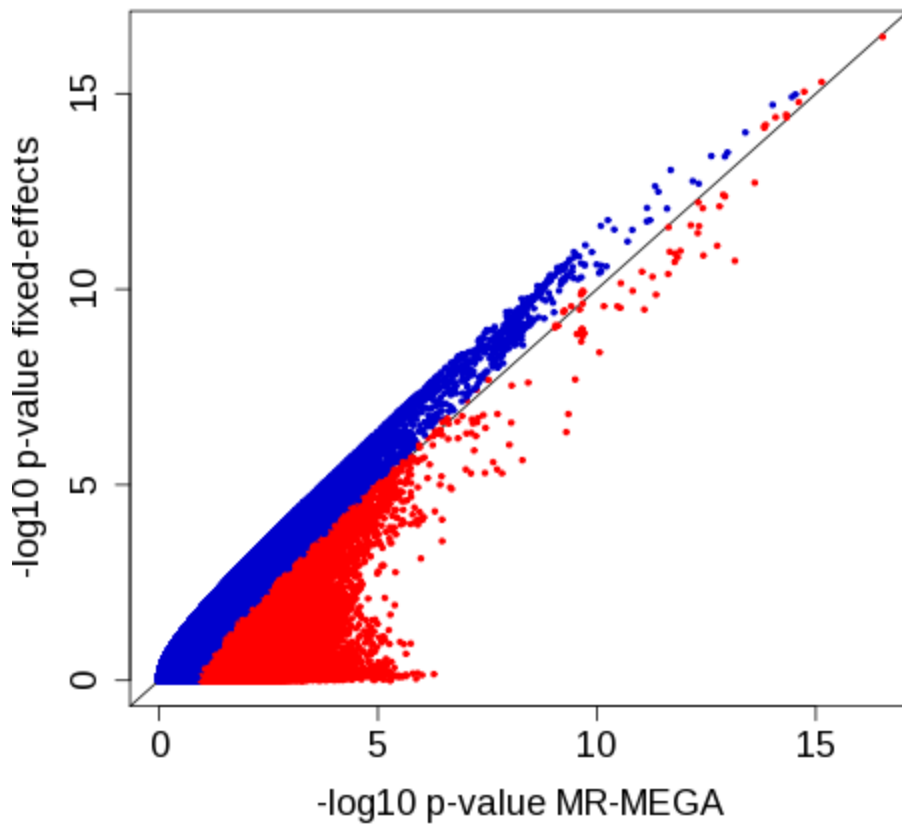

**Figure S5. Forest plot of allelic effects for eGFR at the lead SNP (rs690428) at the *WDR72* locus across GWAS in trans-ethnic meta-analysis of 71,461 individuals from the COGENT-Kidney Consortium.** Allelic effects are aligned to allele A across GWAS: European ancestry (PIVUS, ULSAM, AUSTWIN, WHI-GARNET and WHI-MS), East Asian ancestry (BBJ), Hispanic/Latino ancestry (HCHS/SOL and WHI-SHARe-HIS) and African American ancestry (WHI-SHARe-AFA).

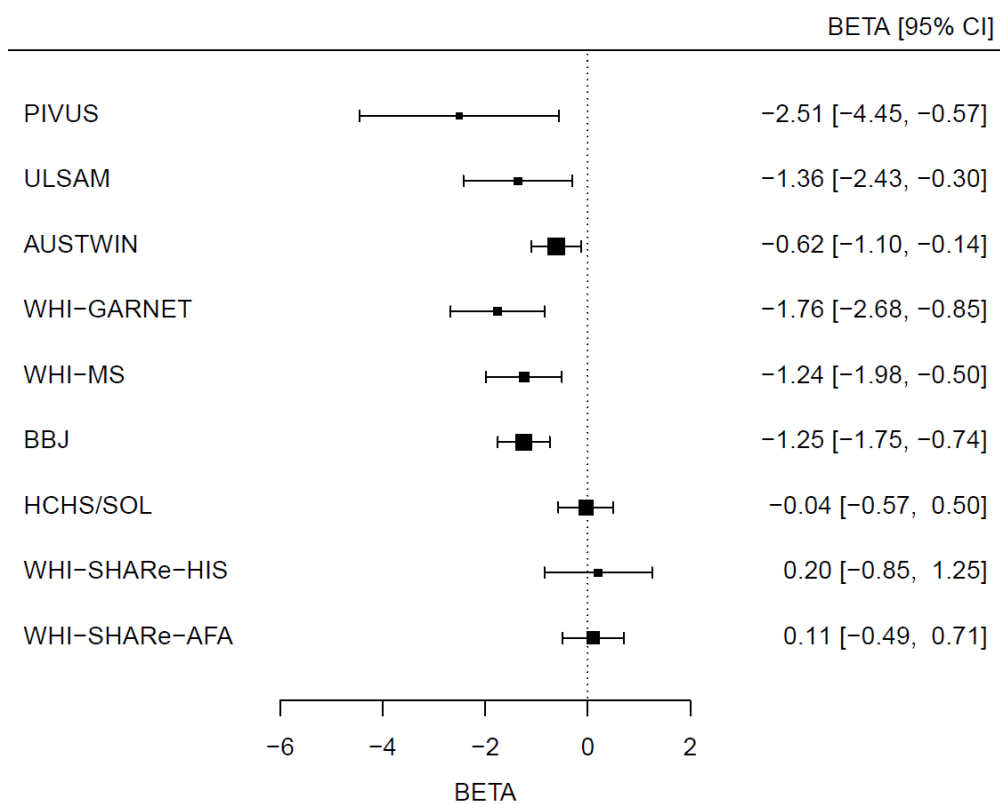

**Figure S6. Axes of genetic variation separating 18 GWAS of T2D susceptibility from the T2D-GENES Consortium.** The first three axes of genetic variation from multi-dimensional scaling of the Euclidean distance matrix between GWAS are sufficient to separate five ancestry groups: African American (AFR), Mexican American (AMR), East Asian (EAS), European (EUR) and SAS (South Asian).

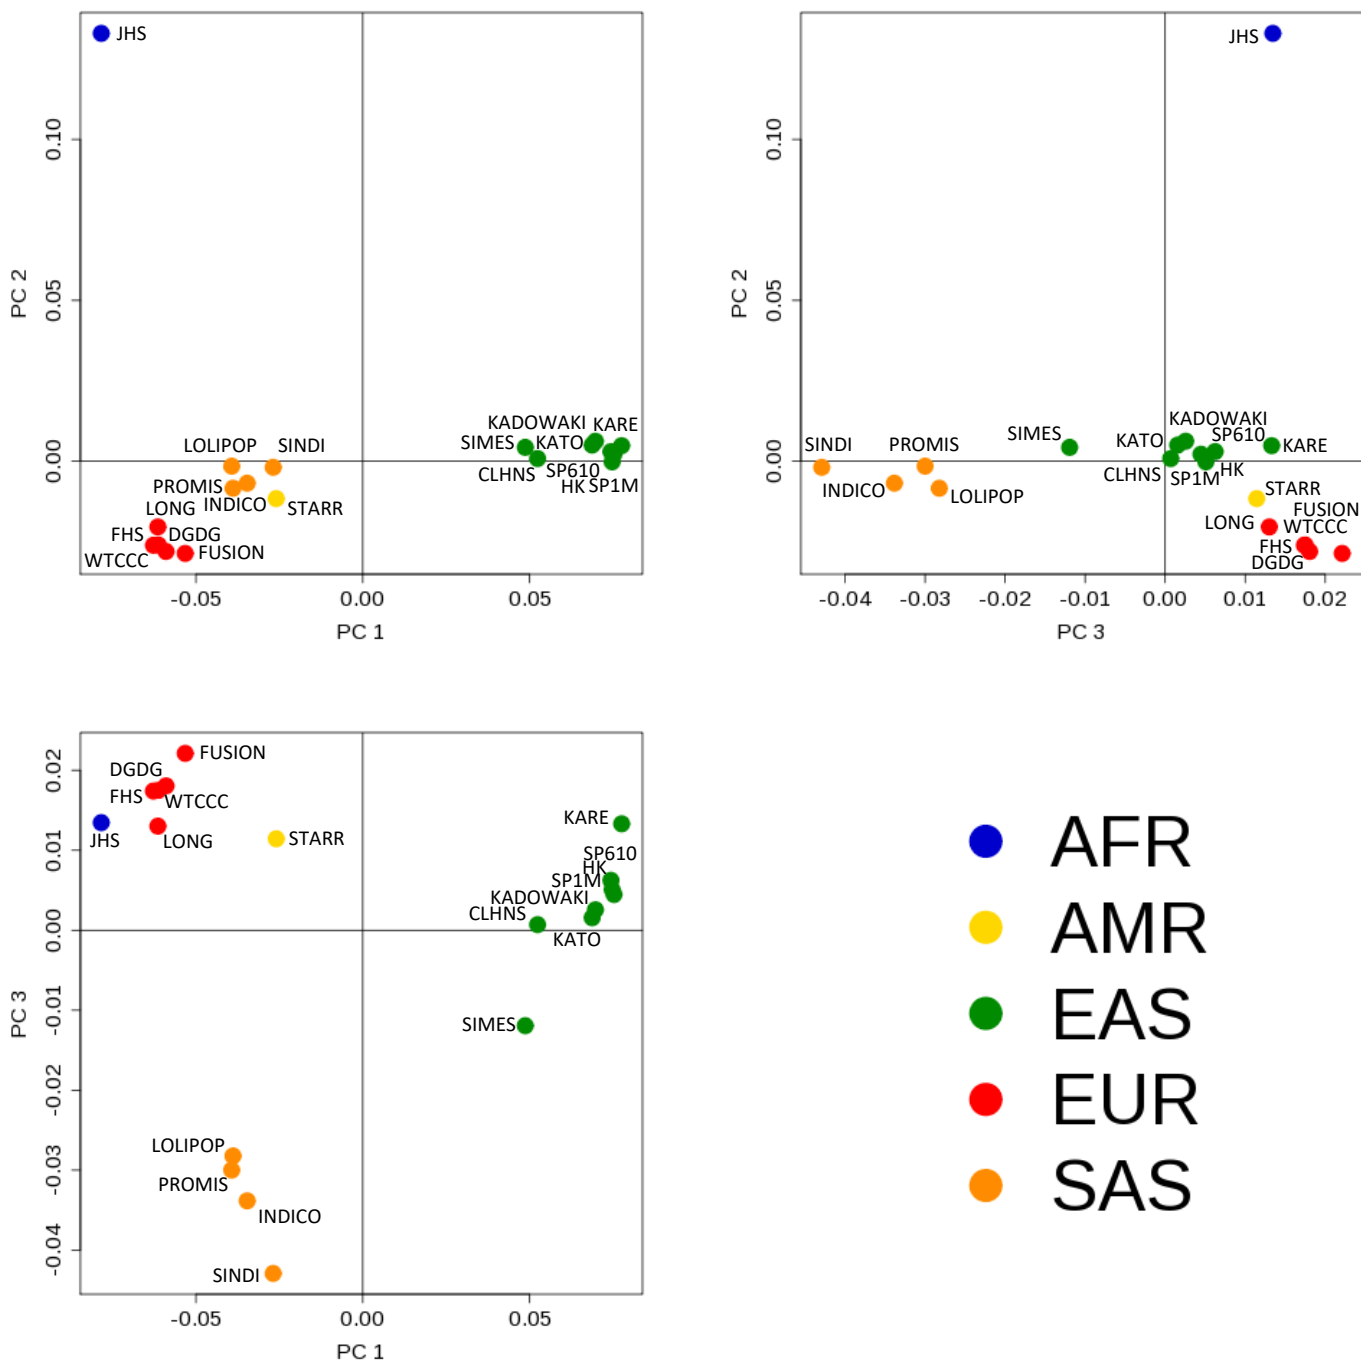

**Figure S7. Signal plots for seven distinct association signals at four T2D susceptibility, constructed on the basis of aggregation of summary statistics from 18 GWAS (22,086 cases and 42,539 controls) from diverse populations using meta-regression accounting for ancestry with three axes of genetic variation as covariates.** Each point represents a SNP passing quality control in the meta-regression, plotted with their  $\log_{10} p$ -value as a function of genomic position (NCBI build 37). In each plot, the index SNP is represented by the purple symbol. The colour coding of all other SNPs indicates LD with the index SNP (estimated by EUR  $r^2$  from 1000 Genomes Project reference haplotypes): red  $r^2 \geq 0.8$ ; gold  $0.6 \leq r^2 < 0.8$ ; green  $0.4 \leq r^2 < 0.6$ ; cyan  $0.2 \leq r^2 < 0.4$ ; blue  $r^2 < 0.2$ ; grey  $r^2$  unknown. Recombination rates are estimated from Phase II HapMap and gene annotations are taken from the UCSC genome browser.

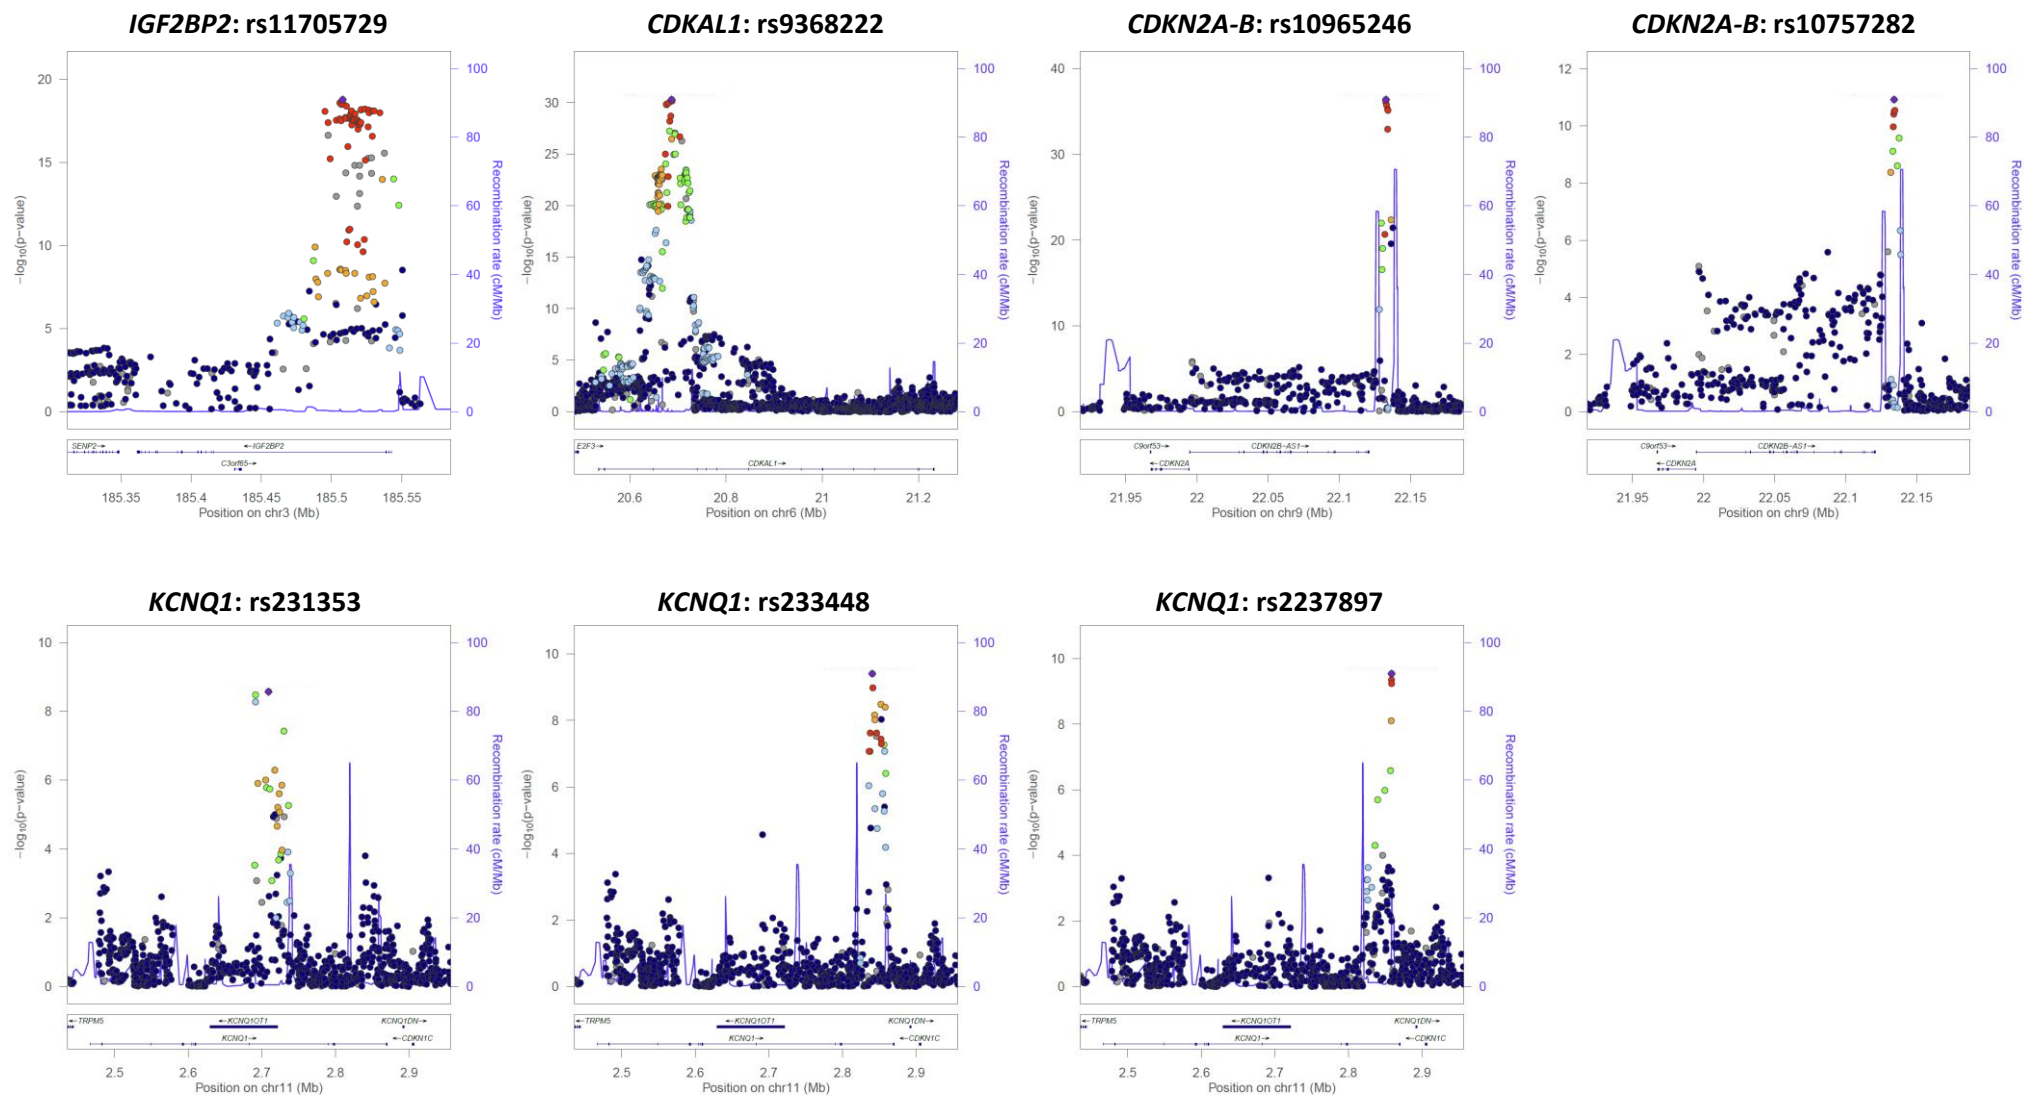

**Figure S8. T2D allelic log-odds ratios for the index SNP, rs9368222, at the *CDKAL1* locus across 18 GWAS (22,086 cases and 42,539 controls) from diverse populations.** Effect sizes in each GWAS are plotted according to their position on the third axis of genetic variation (PC 3). Grey bars represent 95% confidence intervals for log-ORs. Each GWAS is coloured according to ancestry: African American (blue); East Asian (green); European (red); Hispanic (yellow); and South Asian (orange).

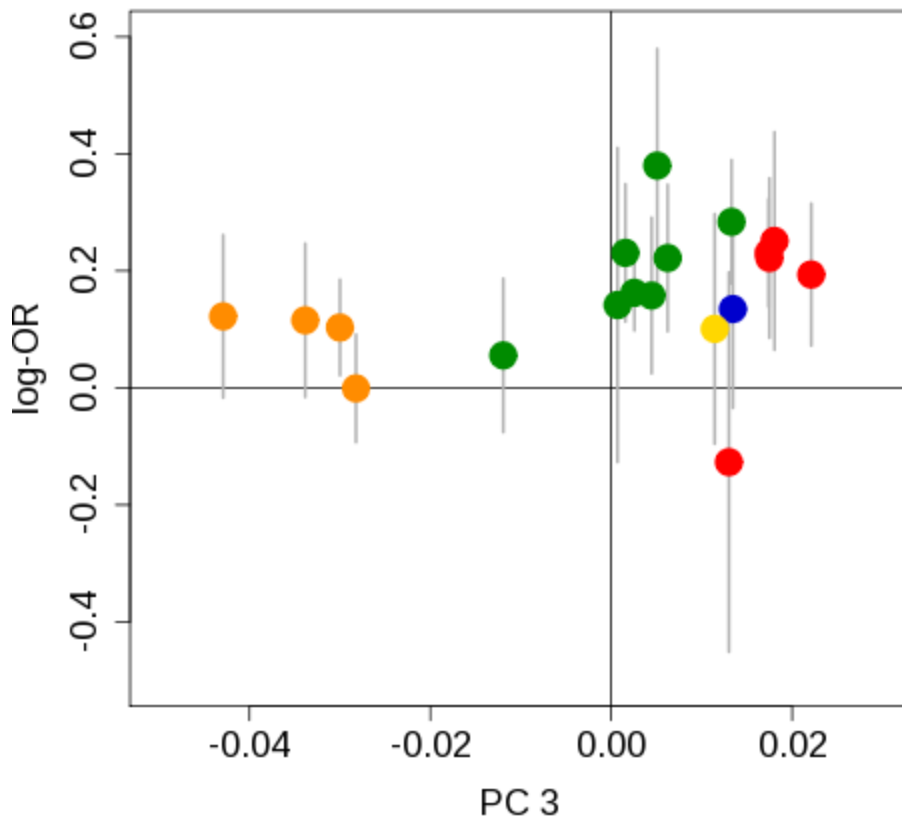



**Figure S9. Comparison of axes of genetic variation obtained from multi-dimensional scaling of pair-wise distances between populations from the Phase 3 1000 Genomes Project reference panel: (i) mean genome-wide allele frequency difference, implemented in MR-MEGA; and (ii) fixation index ( $F_{ST}$ ). Each point represents a population, plotted according to their position on the first three axes of genetic variation (PC1, PC2 and PC3) obtained from the two metrics.**

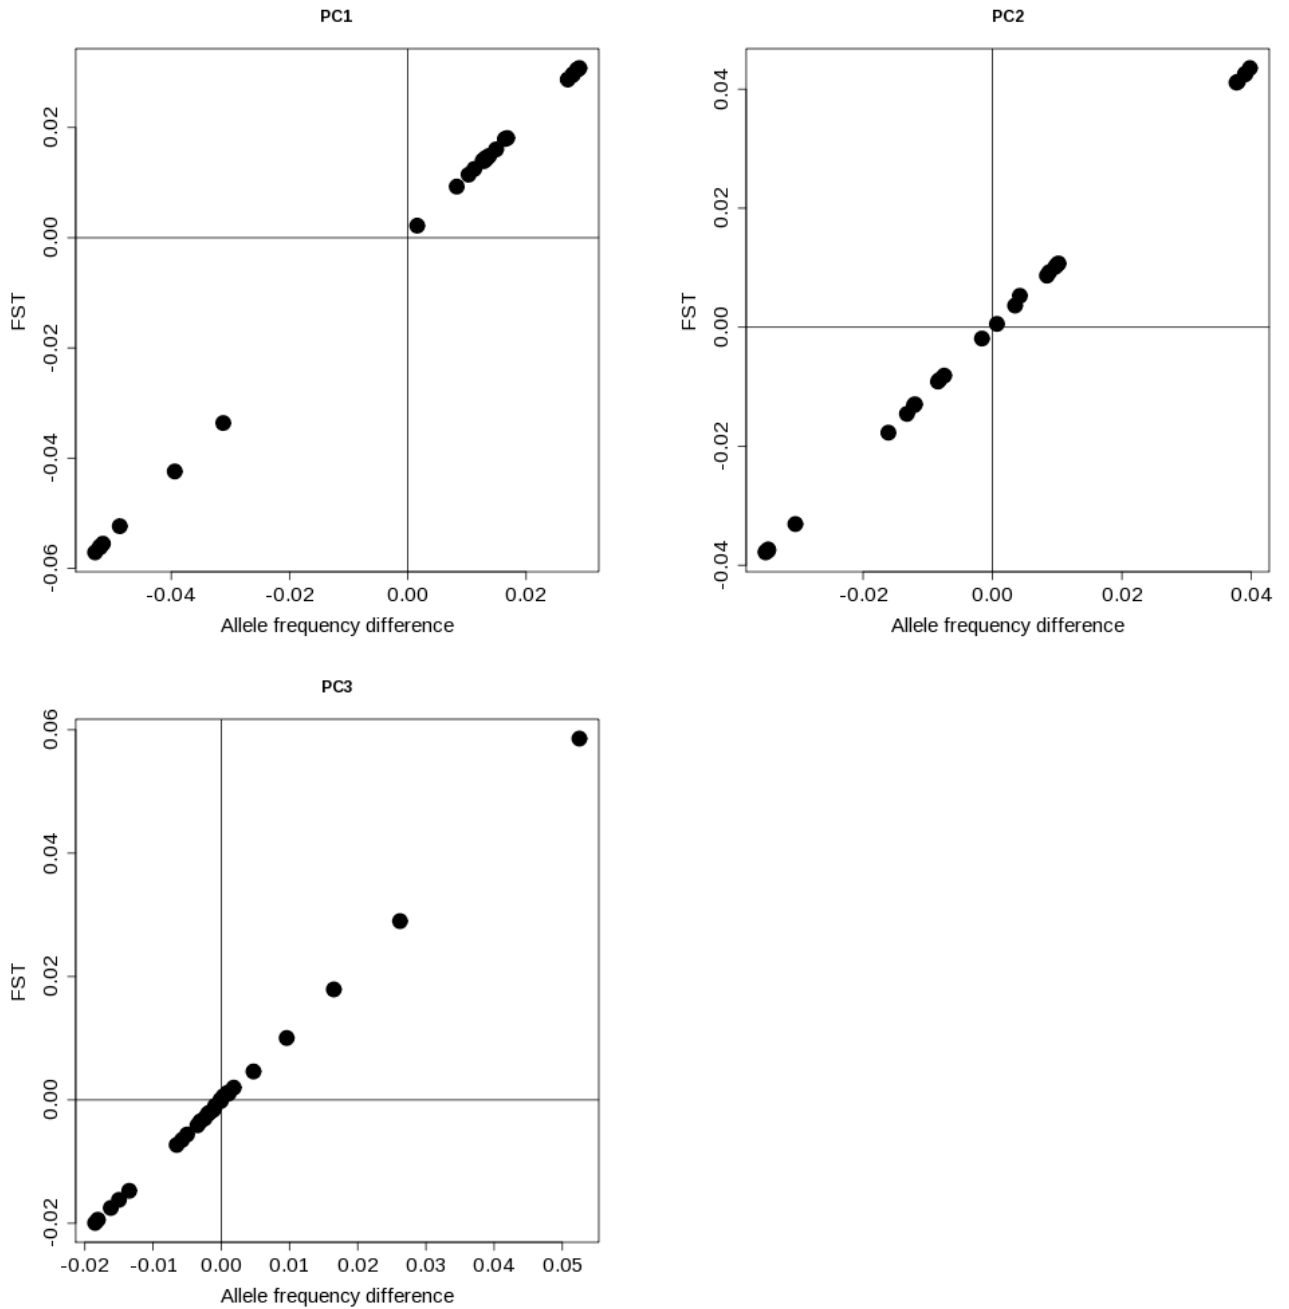

**Table S1. Heterogeneity scenarios parameterised in terms of the allelic odds-ratio,  $\psi$ , in each reference population from Phase 3 of the 1000 Genomes Project.**

| Population |                                             |                 | Heterogeneity scenario |                  |          |                 |               |
|------------|---------------------------------------------|-----------------|------------------------|------------------|----------|-----------------|---------------|
| Code       | Description                                 | Ancestry        | Homogeneous            | African-specific | Eurasian | Native American | Non-ancestral |
| ACB        | African Caribbean in Barbados               | African         | $\psi$                 | $\psi$           | 1        | 1               | $\psi$        |
| ASW        | African Ancestry in Southwest USA           | African         | $\psi$                 | $\psi$           | 1        | 1               | 1             |
| ESN        | Esan in Nigeria                             | African         | $\psi$                 | $\psi$           | 1        | 1               | 1             |
| GWD        | Gambian in Western Division, The Gambia     | African         | $\psi$                 | $\psi$           | 1        | 1               | 1             |
| LWK        | Luhya in Webuye, Kenya                      | African         | $\psi$                 | $\psi$           | 1        | 1               | 1             |
| MSL        | Mende in Sierra Leone                       | African         | $\psi$                 | $\psi$           | 1        | 1               | 1             |
| YRI        | Yoruba in Ibadan, Nigeria                   | African         | $\psi$                 | $\psi$           | 1        | 1               | 1             |
| CLM        | Colombian in Medellin, Colombia             | Native American | $\psi$                 | 1                | $\psi$   | $\psi$          | $\psi$        |
| MXL        | Mexican Ancestry in Los Angeles, California | Native American | $\psi$                 | 1                | $\psi$   | $\psi$          | 1             |
| PEL        | Peruvian in Lima, Peru                      | Native American | $\psi$                 | 1                | $\psi$   | $2\psi$         | 1             |
| PUR        | Puerto Rican in Puerto Rico                 | Native American | $\psi$                 | 1                | $\psi$   | $\psi$          | 1             |
| CDX        | Chinese Dai in Xishuangbanna, China         | East Asian      | $\psi$                 | 1                | $2\psi$  | 1               | $\psi$        |
| CHB        | Han Chinese in Beijing, China               | East Asian      | $\psi$                 | 1                | $2\psi$  | 1               | 1             |
| CHS        | Southern Han Chinese in China               | East Asian      | $\psi$                 | 1                | $2\psi$  | 1               | 1             |
| JPT        | Japanese in Tokyo, Japan                    | East Asian      | $\psi$                 | 1                | $2\psi$  | 1               | 1             |
| KHV        | Kinh in Ho Chi Minh City, Vietnam           | East Asian      | $\psi$                 | 1                | $2\psi$  | 1               | 1             |
| CEU        | Northern/Western European ancestry in Utah  | European        | $\psi$                 | 1                | $\psi$   | 1               | $\psi$        |
| FIN        | Finnish in Finland                          | European        | $\psi$                 | 1                | $\psi$   | 1               | 1             |
| GBR        | British in England and Scotland             | European        | $\psi$                 | 1                | $\psi$   | 1               | 1             |
| IBS        | Iberian populations in Spain                | European        | $\psi$                 | 1                | $\psi$   | 1               | 1             |
| TSI        | Toscani in Italy                            | European        | $\psi$                 | 1                | $\psi$   | 1               | 1             |
| BEB        | Bengali in Bangladesh                       | South Asian     | $\psi$                 | 1                | $\psi$   | 1               | $\psi$        |
| GIH        | Gujarati Indian in Houston, Texas           | South Asian     | $\psi$                 | 1                | $\psi$   | 1               | 1             |
| ITU        | Indian Telugu in the UK                     | South Asian     | $\psi$                 | 1                | $\psi$   | 1               | 1             |
| PJL        | Punjabi in Lahore, Pakistan                 | South Asian     | $\psi$                 | 1                | $\psi$   | 1               | 1             |
| STU        | Sri Lankan Tamil in the UK                  | South Asian     | $\psi$                 | 1                | $\psi$   | 1               | 1             |

**Table S2. False positive error rates (standard error), at a nominal significance threshold ( $p < 0.05$ ), to detect SNP association across a range of heterogeneity scenarios on the basis of aggregation of association summary statistics from 26 GWAS (each of 1,000 cases and 1,000 controls) from diverse populations using: (i) fixed-effects (inverse-variance weighted log-odds ratios) meta-analysis; (ii) random-effects (RE2) meta-analysis; and (iii) meta-regression accounting for ancestry with three axes of genetic variation as covariates.**

| <b>Heterogeneity scenario</b> | <b>Fixed-effects meta-analysis</b> | <b>Random-effects meta-analysis</b> | <b>Meta-regression</b> |
|-------------------------------|------------------------------------|-------------------------------------|------------------------|
| Homogeneous                   | 0.0482 (0.0068)                    | 0.0468 (0.0067)                     | 0.0478 (0.0067)        |
| African-specific              | 0.0540 (0.0071)                    | 0.0506 (0.0069)                     | 0.0512 (0.0070)        |
| Eurasian                      | 0.0492 (0.0068)                    | 0.0470 (0.0067)                     | 0.0460 (0.0066)        |
| Native American               | 0.0480 (0.0068)                    | 0.0472 (0.0067)                     | 0.0504 (0.0069)        |
| Non-ancestral                 | 0.0492 (0.0068)                    | 0.0496 (0.0069)                     | 0.0480 (0.0068)        |

**Table S3. Coverage of the causal variant by the 99% credible set across 500 simulations of each scenario with imputed data for five fine-mapping approaches: (i) fixed-effects meta-analysis; (ii) random-effects meta-analysis; (iii) meta-regression accounting for heterogeneity in allelic effects implemented in MR-MEGA; (iv) MANTRA; and (v) PAINTOR.**

| Fine-mapping method | Heterogeneity scenario |                  |          |                 |               |
|---------------------|------------------------|------------------|----------|-----------------|---------------|
|                     | Homogeneous            | African-specific | Eurasian | Native American | Non-ancestral |
| Fixed-effects       | 0.976                  | 0.966            | 0.614    | 0.924           | 0.966         |
| Random-effects      | 0.974                  | 0.964            | 0.938    | 0.966           | 0.966         |
| Meta-regression     | 0.962                  | 0.96             | 0.846    | 0.892           | 0.92          |
| MANTRA              | 0.966                  | 0.936            | 0.836    | 0.808           | 0.884         |
| PAINTOR             | 0.544                  | 0.698            | 0.802    | 0.778           | 0.77          |

**Table S4. Mean run times for five fine-mapping methods to assess association with variants within a 1Mb locus, using a dedicated single core processor.**

| <b>Method</b>                           | <b>Mean run time (minutes)</b> |
|-----------------------------------------|--------------------------------|
| Fixed-effects meta-analysis (METASOFT)  | 0.010                          |
| Random-effects meta-analysis (METASOFT) | 0.010                          |
| Meta-regression (MR-MEGA)               | 0.84                           |
| MANTRA                                  | 66                             |
| PAINTOR                                 | 1.2                            |

**Table S5. Sample characteristics, imputation and analysis of GWAS contributing to trans-ethnic meta-analysis of eGFR in 71,461 individuals from the COGENT-Kidney Consortium.**

| Study acronym | Ethnicity              | Sex     | Sample size | eGFR mean (SD) | Pre-phasing and imputation |                 |            | Association analysis |                                          |                |
|---------------|------------------------|---------|-------------|----------------|----------------------------|-----------------|------------|----------------------|------------------------------------------|----------------|
|               |                        |         |             |                | Software                   | Quality         | SNPs       | Software             | Covariates                               | $\lambda_{GC}$ |
| PIVUS         | European (Sweden)      | Males   | 471         | 83.8 (19.9)    | SHAPEITv2                  | info $\geq$ 0.4 | 9,316,737  | SNPTESTv2            | Age, sex, 2 PCs                          | 0.982          |
|               |                        | Females | 473         | 77.9 (20.2)    | IMPUTEv2                   |                 |            |                      |                                          |                |
| ULSAM         | European (Sweden)      | Males   | 1,080       | 75.2 (11.3)    | SHAPEITv2                  | info $\geq$ 0.4 | 9,388,420  | SNPTESTv2            | Age, 2 PCs                               | 1.013          |
|               |                        | Females | 0           | N/A            | IMPUTEv2                   |                 |            |                      |                                          |                |
| AUSTWIN       | European (Australia)   | Males   | 4,662       | 76.6 (15.8)    | MaCH                       | $r^2 \geq 0.3$  | 8,584,822  | MERLIN               | Age, sex, sub-study, 10 PCs              | 1.120          |
|               |                        | Females | 7,096       | 75.1 (16.5)    | minimac                    |                 |            |                      |                                          |                |
| WHI-MS        | European (USA)         | Males   | 0           | N/A            | Beagle                     | $r^2 \geq 0.3$  | 8,814,333  | ProbABEL/R           | Age, centre, 10 PCs                      | 1.025          |
|               |                        | Females | 5,655       | 85.6 (17.8)    | minimac                    |                 |            |                      |                                          |                |
| WHI-GARNET    | European (USA)         | Males   | 0           | N/A            | Beagle                     | $r^2 \geq 0.3$  | 8,864,693  | ProbABEL/R           | Age, centre, 10 PCs                      | 1.018          |
|               |                        | Females | 4,116       | 88.1 (19.3)    | minimac                    |                 |            |                      |                                          |                |
| BBJ           | East Asian (Japan)     | Males   | 12,802      | 100.2 (28.5)   | MaCH                       | $r^2 \geq 0.5$  | 6,581,000  | mach2qtl             | None                                     | 1.058          |
|               |                        | Females | 10,734      | 109.1 (31.0)   | minimac                    |                 |            |                      |                                          |                |
| HCHS/SOL      | Hispanic/Latino (USA)  | Males   | 5,179       | 95.5 (22.3)    | SHAPEITv2                  | info $\geq$ 0.4 | 11,385,919 | LMM-OPSa             | Age, sex, centre, sampling weights, 5PCs | 1.006          |
|               |                        | Females | 7,420       | 96.6 (23.4)    | IMPUTEv2                   |                 |            |                      |                                          |                |
| WHI-SHARe     | Hispanic/Latino (USA)  | Males   | 0           | N/A            | MaCH                       | $r^2 \geq 0.3$  | 10,025,812 | ProbABEL             | Age, centre, 10 PCs                      | 1.027          |
|               |                        | Females | 3,549       | 94.7 (21.9)    |                            |                 |            |                      |                                          |                |
|               | African American (USA) | Males   | 0           | N/A            | MaCH                       | $r^2 \geq 0.3$  | 15,345,552 | ProbABEL             | Age, centre, 10 PCs                      | 1.033          |
|               |                        | Females | 8,224       | 80.1 (19.4)    |                            |                 |            |                      |                                          |                |

SD: standard deviation.

**Table S6. Sample characteristics of GWAS contributing to trans-ethnic meta-analysis of T2D susceptibility in 22,086 cases and 42,539 controls from the T2D-GENES Consortium.**

| Study        | Ancestry group (country of origin) | Case-control status | Sample characteristics      |                       |                                |                                    |                                    |
|--------------|------------------------------------|---------------------|-----------------------------|-----------------------|--------------------------------|------------------------------------|------------------------------------|
|              |                                    |                     | Sample size (males/females) | Age (years) mean (SD) | Age at onset (years) mean (SD) | Fasting glucose (mmol/l) mean (SD) | BMI (kg/m <sup>2</sup> ) mean (SD) |
| DG DG        | European: French (France)          | Cases               | 679 (413/266)               | 59.5 (10.1)           | 45.1 (8.4)                     | 9.2 (3.1)                          | 25.9 (2.8)                         |
|              |                                    | Controls            | 697 (281/416)               | 53.9 (5.6)            |                                | 5.1 (0.4)                          | 23.2 (1.8)                         |
| FHS          | European (USA)                     | Cases               | 677 (386/287)               | 63.7 (12.4)           | N/A                            | 8.6 (2.8)                          | 31.4 (6.5)                         |
|              |                                    | Controls            | 7,660 (3,441/4,219)         | 52.3 (16.0)           |                                | 5.3 (0.5)                          | 27.0 (5.1)                         |
| FUSION       | European: Finnish (Finland)        | Cases               | 1,160 (653/507)             | 62.9 (7.6)            | 53.7 (9.1)                     | 9.4 (3.1)                          | 30.2 (4.7)                         |
|              |                                    | Controls            | 1,172 (572/600)             | 63.6 (7.4)            |                                | 5.3 (0.5)                          | 27.1 (3.9)                         |
| LONGENITY    | European: Ashkenazim (USA)         | Cases               | 119 (45/74)                 | 89.6 (13.5)           | N/A                            | N/A                                | N/A                                |
|              |                                    | Controls            | 465 (147/318)               | 85.2 (15.2)           |                                | N/A                                | N/A                                |
| WTCCC        | European: UK (UK)                  | Cases               | 1,924 (1,118/806)           | 58.6 (9.2)            | 50.3 (9.2)                     | N/A                                | 30.7 (6.1)                         |
|              |                                    | Controls            | 2,938 (1,446/1,492)         | N/A                   |                                | N/A                                | N/A                                |
| Starr County | Mexican American (USA)             | Cases               | 837 (333/504)               | 56.5 (11.8)           | 46.7 (10.9)                    | 10.0 (4.1)                         | 31.8 (6.4)                         |
|              |                                    | Controls            | 436 (137/299)               | 37.6 (9.0)            |                                | 4.7 (0.5)                          | 29.5 (6.5)                         |
| INDICO       | South Asian: Indian (North India)  | Cases               | 1,126 (652/474)             | 53.43(10.67)          | 46.02(10.39)                   | 8.59(3.36)                         | 25.27(4.21)                        |
|              |                                    | Controls            | 1,135 (597/538)             | 52.35(10.13)          |                                | 4.76(0.66)                         | 24.45(4.78)                        |
| LOLIPOP      | South Asian: Indian (UK)           | Cases               | 1,783 (1,478/305)           | 59.4 (9.2)            | N/A                            | 8.6 (3.1)                          | 28.1 (4.6)                         |
|              |                                    | Controls            | 4,773 (4,048/725)           | 53.9 (10.7)           |                                | 5.2 (0.6)                          | 26.8 (4.2)                         |
| PROMIS       | South Asian: Pakistani (Pakistan)  | Cases               | 2,310 (1,765/545)           | 55.0 (9.3)            | N/A                            | N/A                                | 26.0 (4.0)                         |
|              |                                    | Controls            | 6,698 (5,561/1,137)         | 52.9 (10.5)           |                                | N/A                                | 25.3 (3.9)                         |
| SINDI        | South Asian: Indian (Singapore)    | Cases               | 977 (531/446)               | 60.7 (9.9)            | N/A                            | 9.7 (4.4)                          | 27.1 (5.1)                         |
|              |                                    | Controls            | 1,169 (566/603)             | 55.7 (9.7)            |                                | 5.4 (1.1)                          | 25.3 (4.4)                         |
| BBJ          | East Asian: Japanese (Japan)       | Cases               | 4,470 (3,027/1,429)         | 65.8 (10.0)           | N/A                            | N/A                                | 25.3 (3.3)                         |
|              |                                    | Controls            | 3,071 (1,600/1,300)         | 52.1 (15.0)           |                                | N/A                                | 24.1 (3.0)                         |
| CAGE         | East Asian: Japanese (Japan)       | Cases               | 931 (623/308)               | 66.1 (9.5)            | N/A                            | N/A                                | 24.4 (3.4)                         |
|              |                                    | Controls            | 1,404 (844/560)             | 65.9 (7.4)            |                                | N/A                                | 23.1 (3.0)                         |
| CLHNS        | East Asian: Filipino (Philippines) | Cases               | 158 (0/158)                 | 49.6 (6.1)            | N/A                            | N/A                                | 24.4 (3.4)                         |
|              |                                    | Controls            | 1,523 (0/1,523)             | 48.3 (6.1)            |                                | N/A                                | 23.1 (3.0)                         |
| Hong Kong    | East Asian: Chinese (Hong Kong)    | Cases               | 462 (222/240)               | 56.9 (13.0)           | 47.5 (13.9)                    | 9.6 (3.7)                          | 25.8 (5.3)                         |
|              |                                    | Controls            | 744 (352/392)               | 37.2 (16.3)           |                                | 4.7 (0.4)                          | 20.8 (2.0)                         |
| KARE         | East Asian: Korean (Korea)         | Cases               | 1,042 (539/503)             | 56.4 (8.6)            | N/A                            | 7.0 (2.6)                          | 25.5 (3.3)                         |
|              |                                    | Controls            | 2,943 (1,355/1,588)         | 51.5 (8.6)            |                                | 4.5 (0.4)                          | 24.1 (3.0)                         |
| SDCS/SP2(1)  | East Asian: Chinese (Singapore)    | Cases               | 1,082 (402/680)             | 65.1 (9.7)            | 55.7 (12.0)                    | N/A                                | 25.3 (3.9)                         |
|              |                                    | Controls            | 1,006 (217/789)             | 47.7 (11.1)           |                                | 4.7 (0.5)                          | 22.3 (3.7)                         |
| SDCS/SP2(2)  | East Asian: Chinese (Singapore)    | Cases               | 928 (602/326)               | 63.7 (10.8)           | 52.2 (14.4)                    | N/A                                | 25.4 (3.8)                         |
|              |                                    | Controls            | 939 (599/340)               | 46.7 (10.2)           |                                | 4.7 (0.5)                          | 22.8 (3.4)                         |
| SiMES        | East Asian: Malay (Singapore)      | Cases               | 794 (388/406)               | 62.3 (9.9)            | 54.4 (11.2)                    | N/A                                | 27.8 (4.9)                         |
|              |                                    | Controls            | 1,240 (595/645)             | 56.9 (11.4)           |                                | N/A                                | 25.1 (4.8)                         |
| JHS          | African American (USA)             | Cases               | 631 (212/419)               | 59.4 (10.5)           | 49.9 (11.7)                    | 7.7 (3.1)                          | 34.2 (7.1)                         |
|              |                                    | Controls            | 2,526 (980/1,546)           | 53.6 (13.1)           |                                | 5.0 (0.5)                          | 31.3 (7.3)                         |

SD: standard deviation
